# Supplementary material
Source: PubMed Central journal article supplement (PMC8800178)

A.

Severe COVID vs. Severe Flu

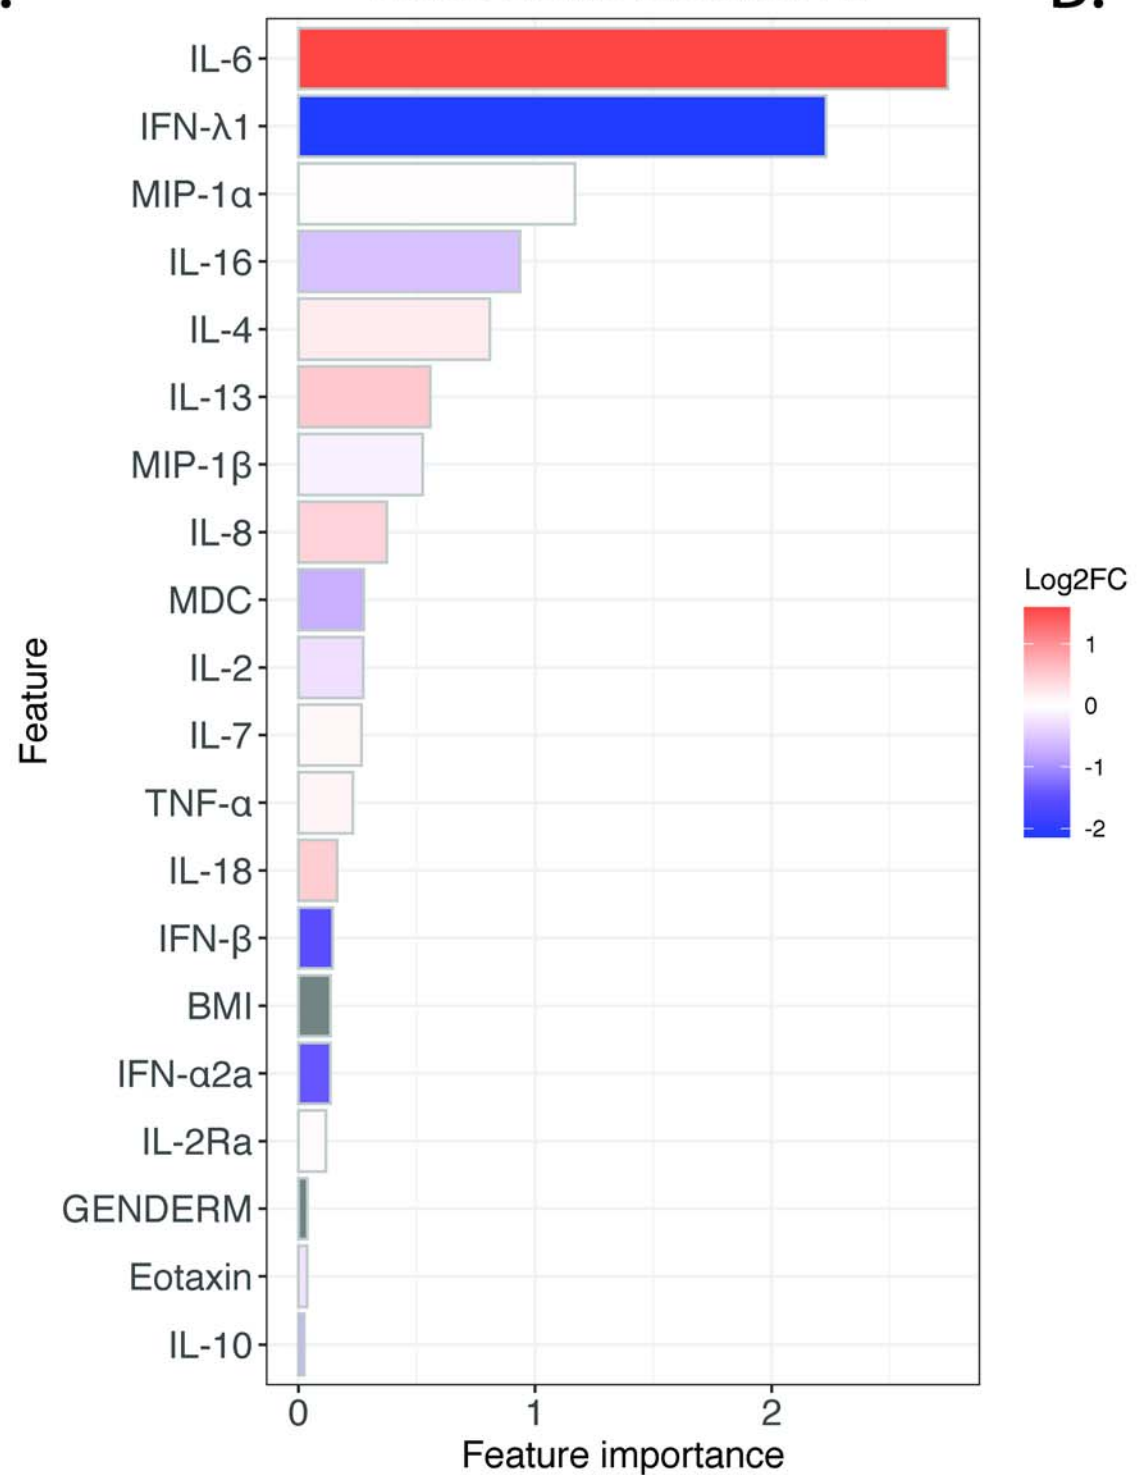

B.

Severe COVID vs. Severe Flu

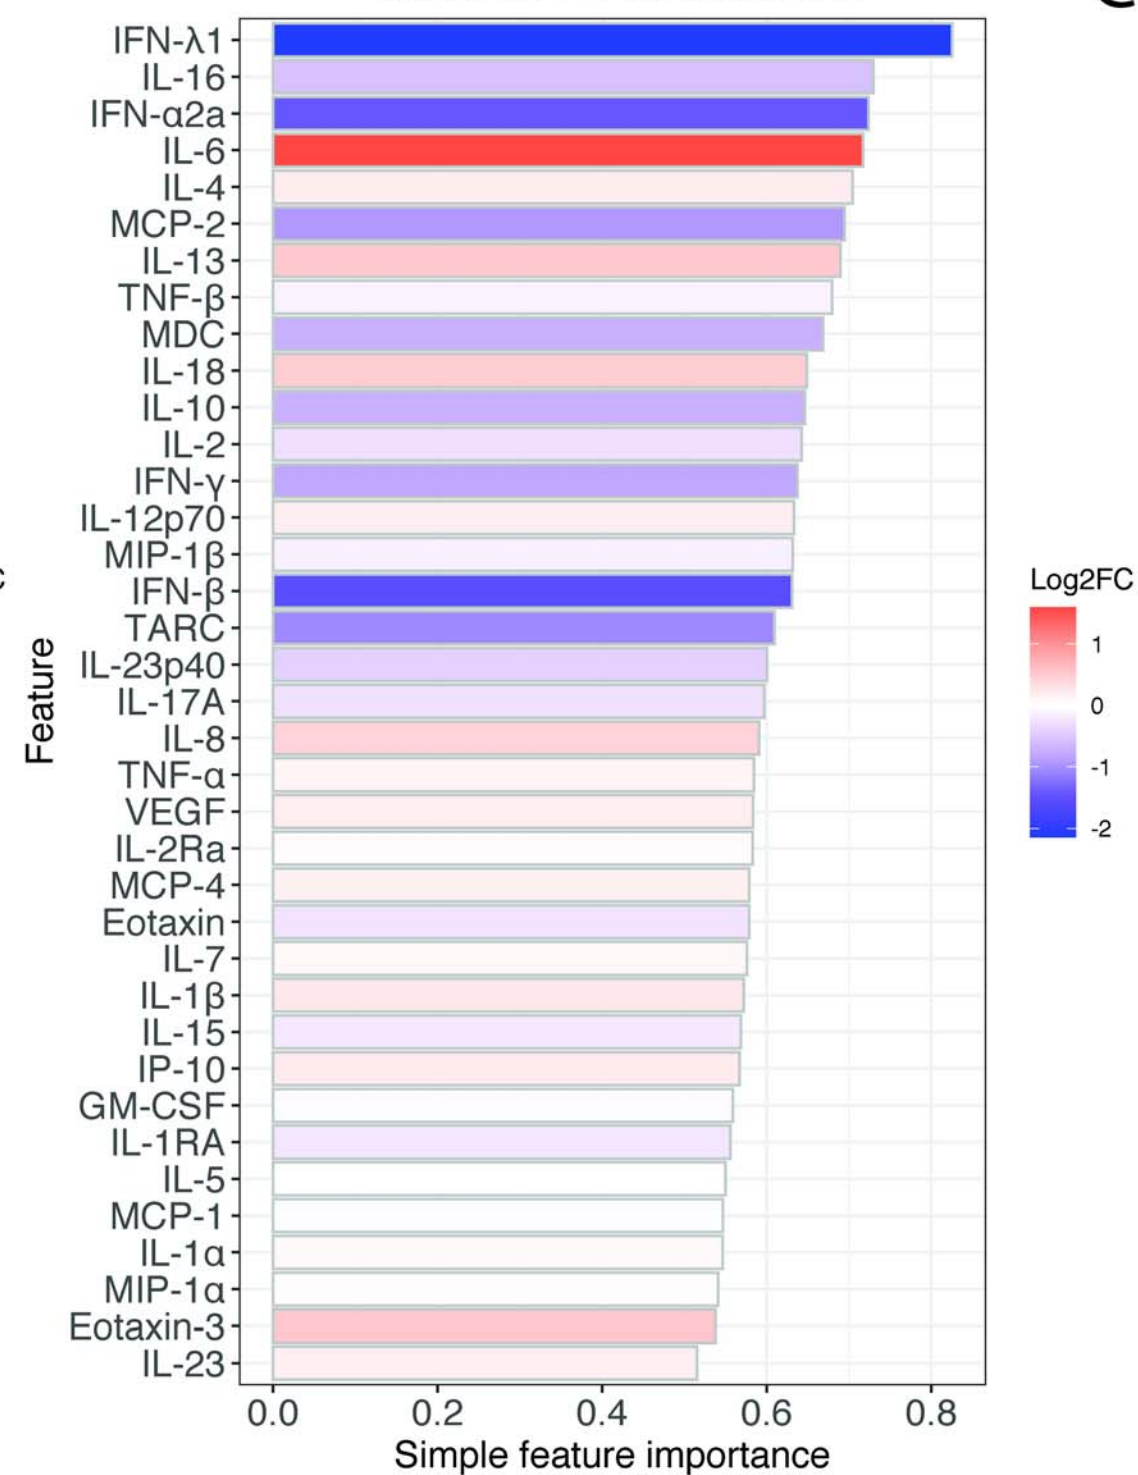

C.

Severe COVID vs. Severe Flu

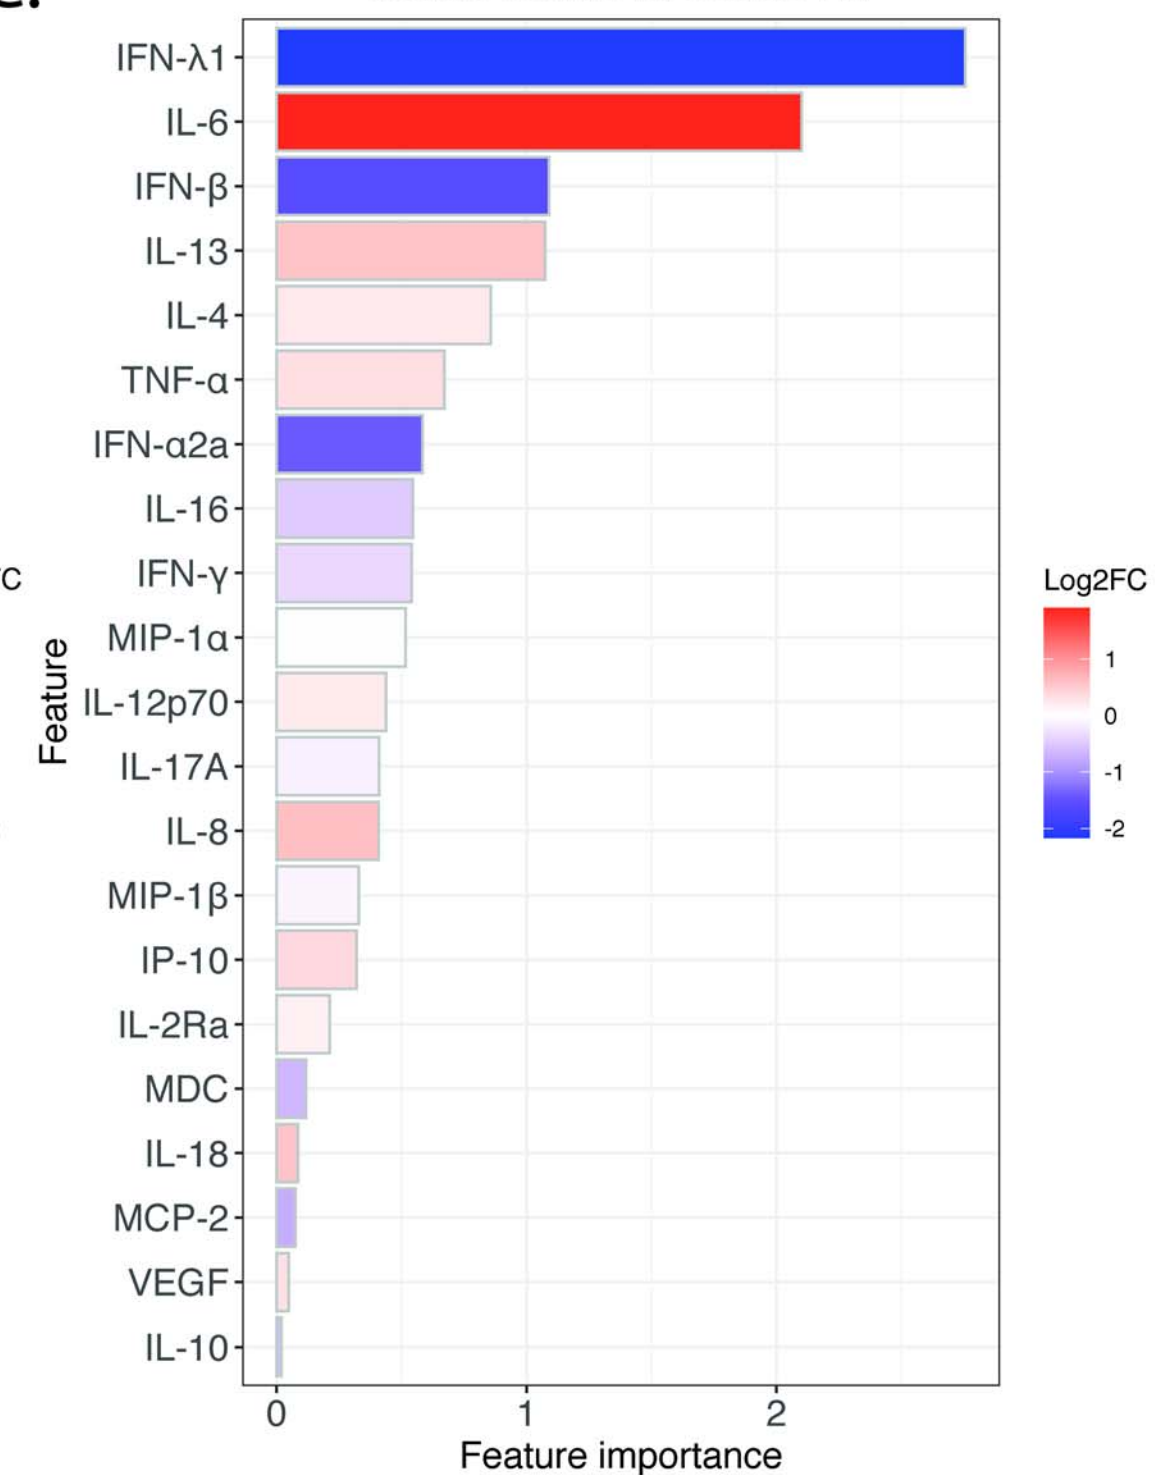

D.

Average AUC = 0.77

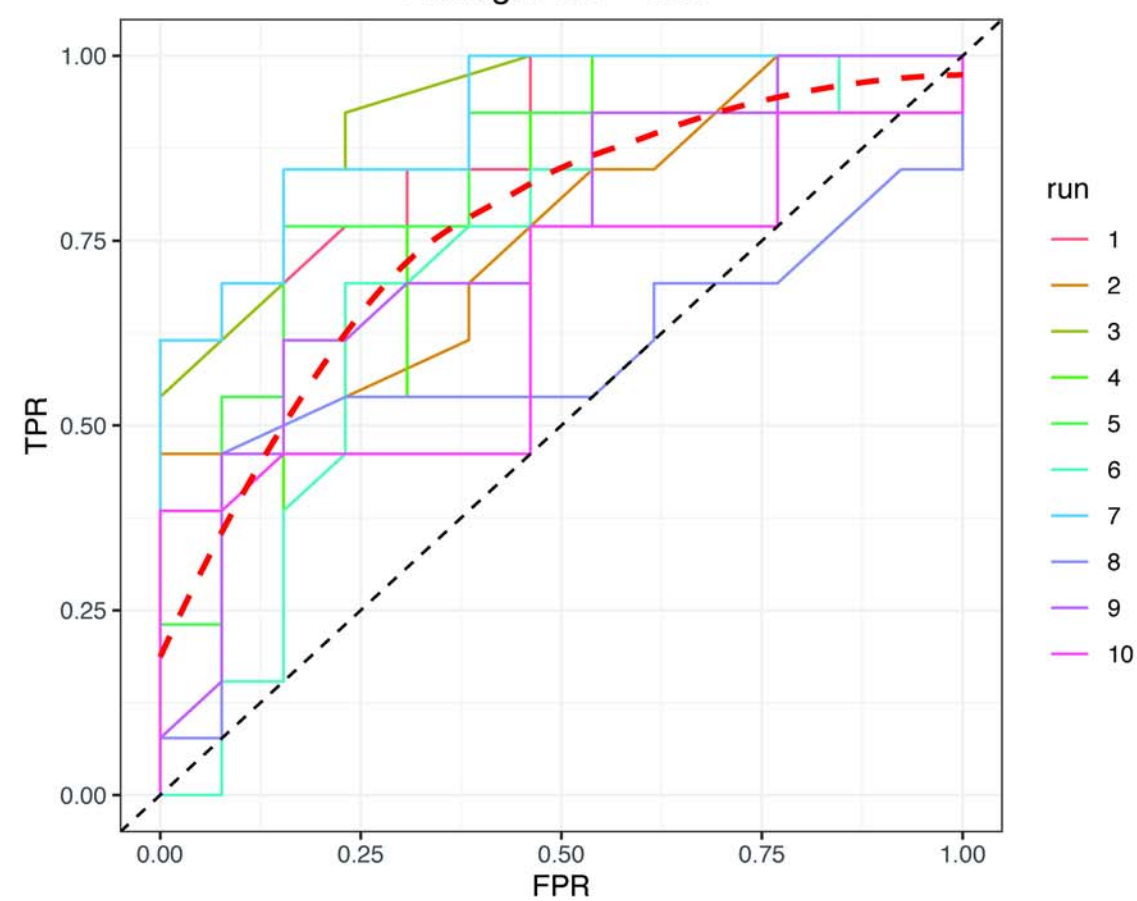

E.

Average AUC = 0.715

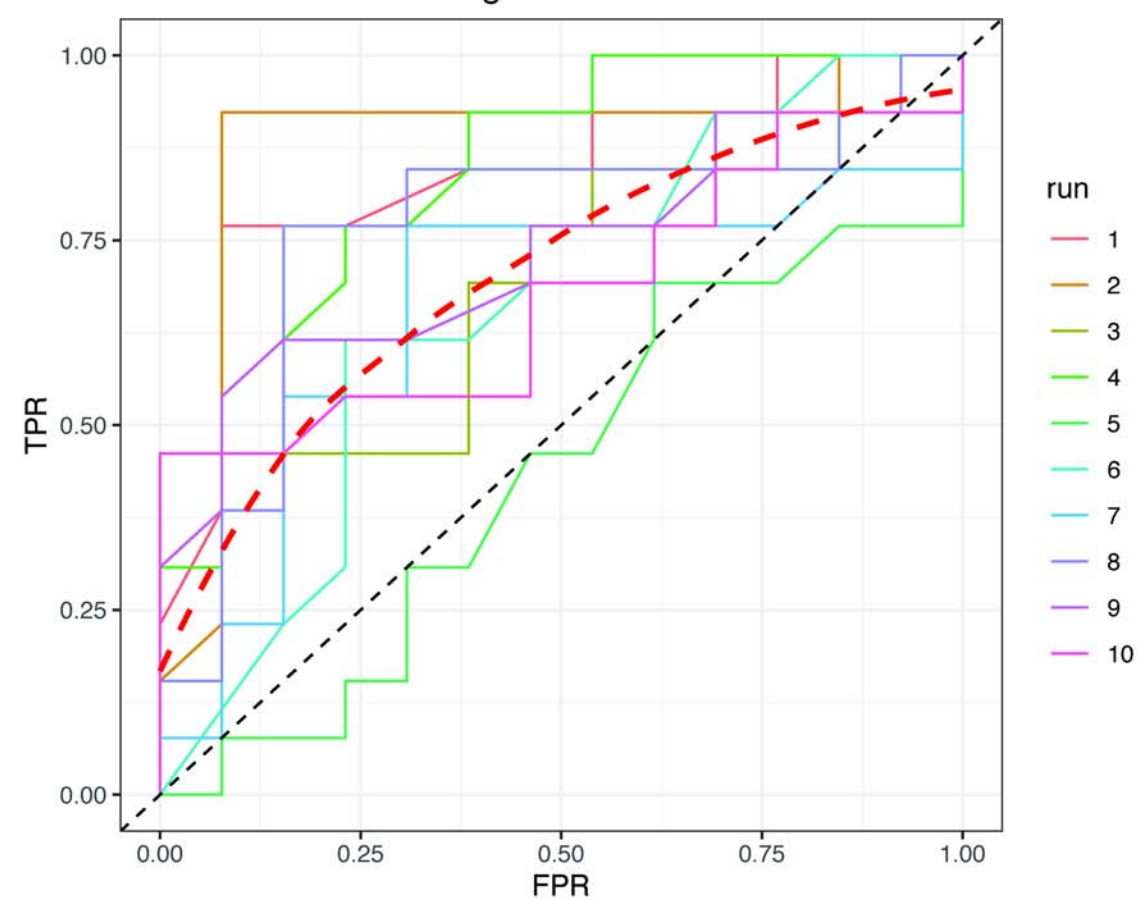

Supplement: ciab376_suppl_supplementary_figure_s4.pdf [file ciab376_suppl_supplementary_figure_s4.pdf]
