# Supplementary material
Source: PubMed Central journal article supplement (PMC8800178)

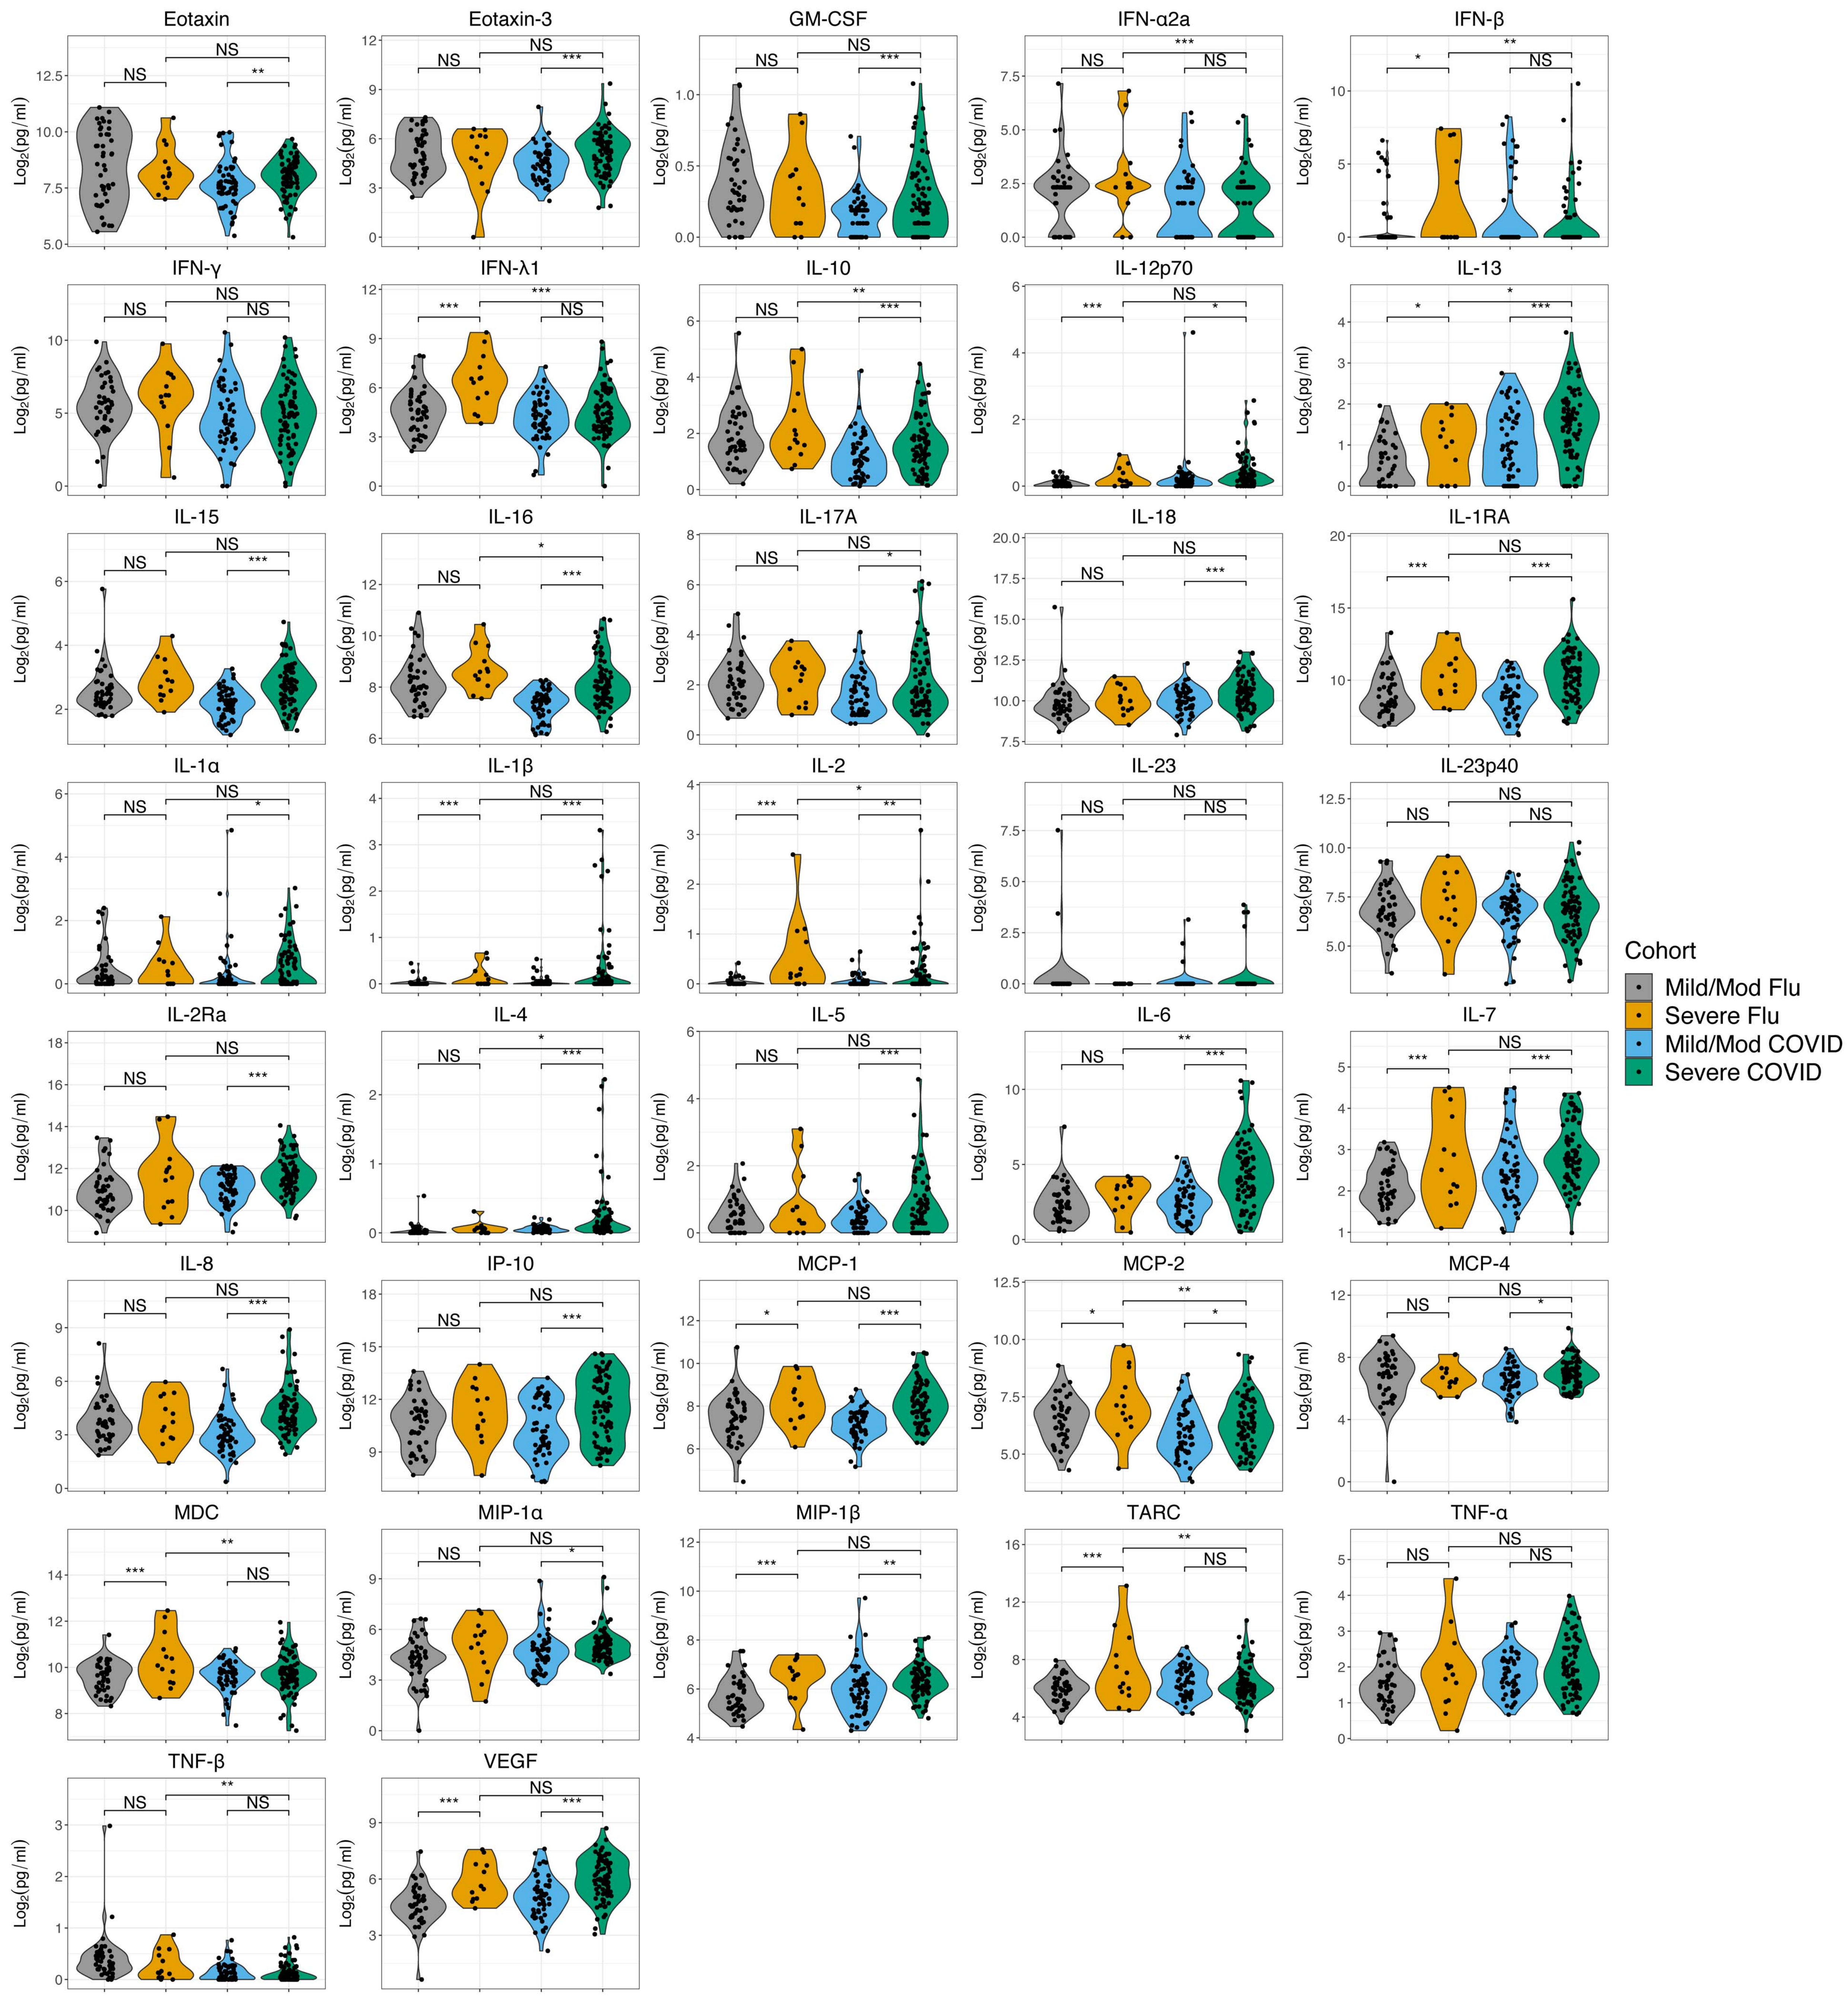

Supplement: ciab376_suppl_supplementary_figure_s3.pdf [file ciab376_suppl_supplementary_figure_s3.pdf]

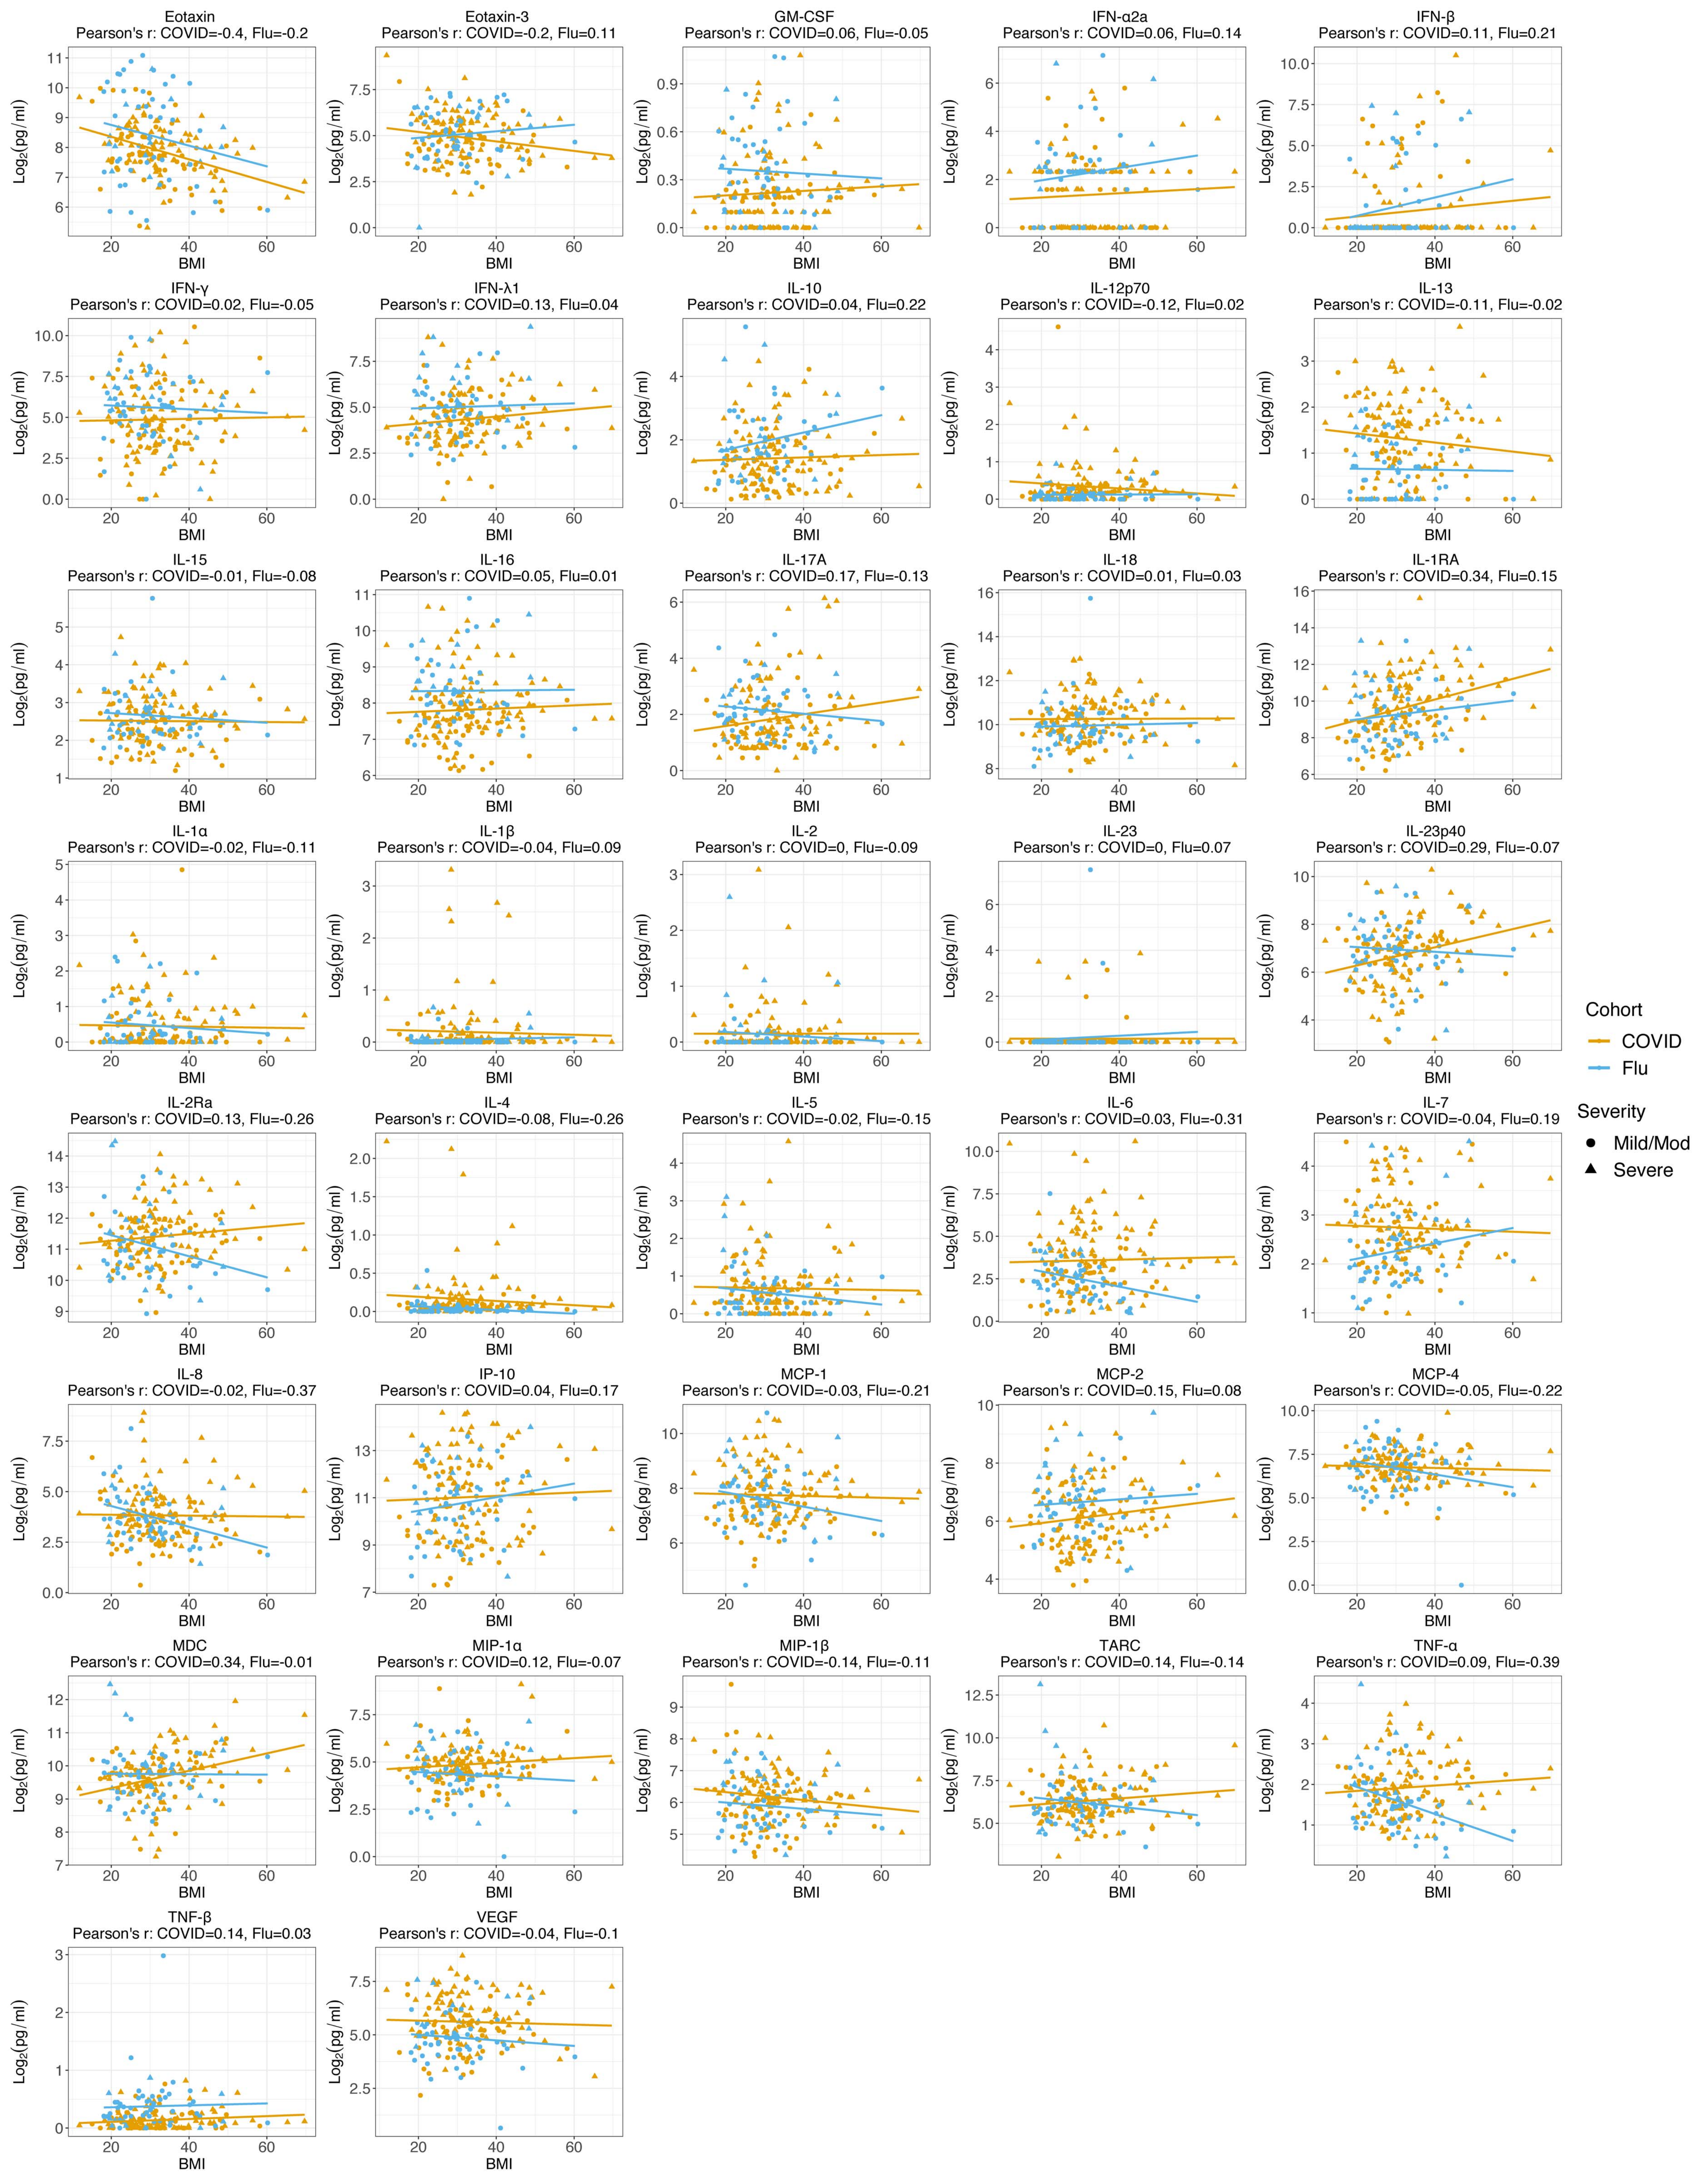

Supplement: ciab376_suppl_supplementary_figure_s5.pdf [file ciab376_suppl_supplementary_figure_s5.pdf]

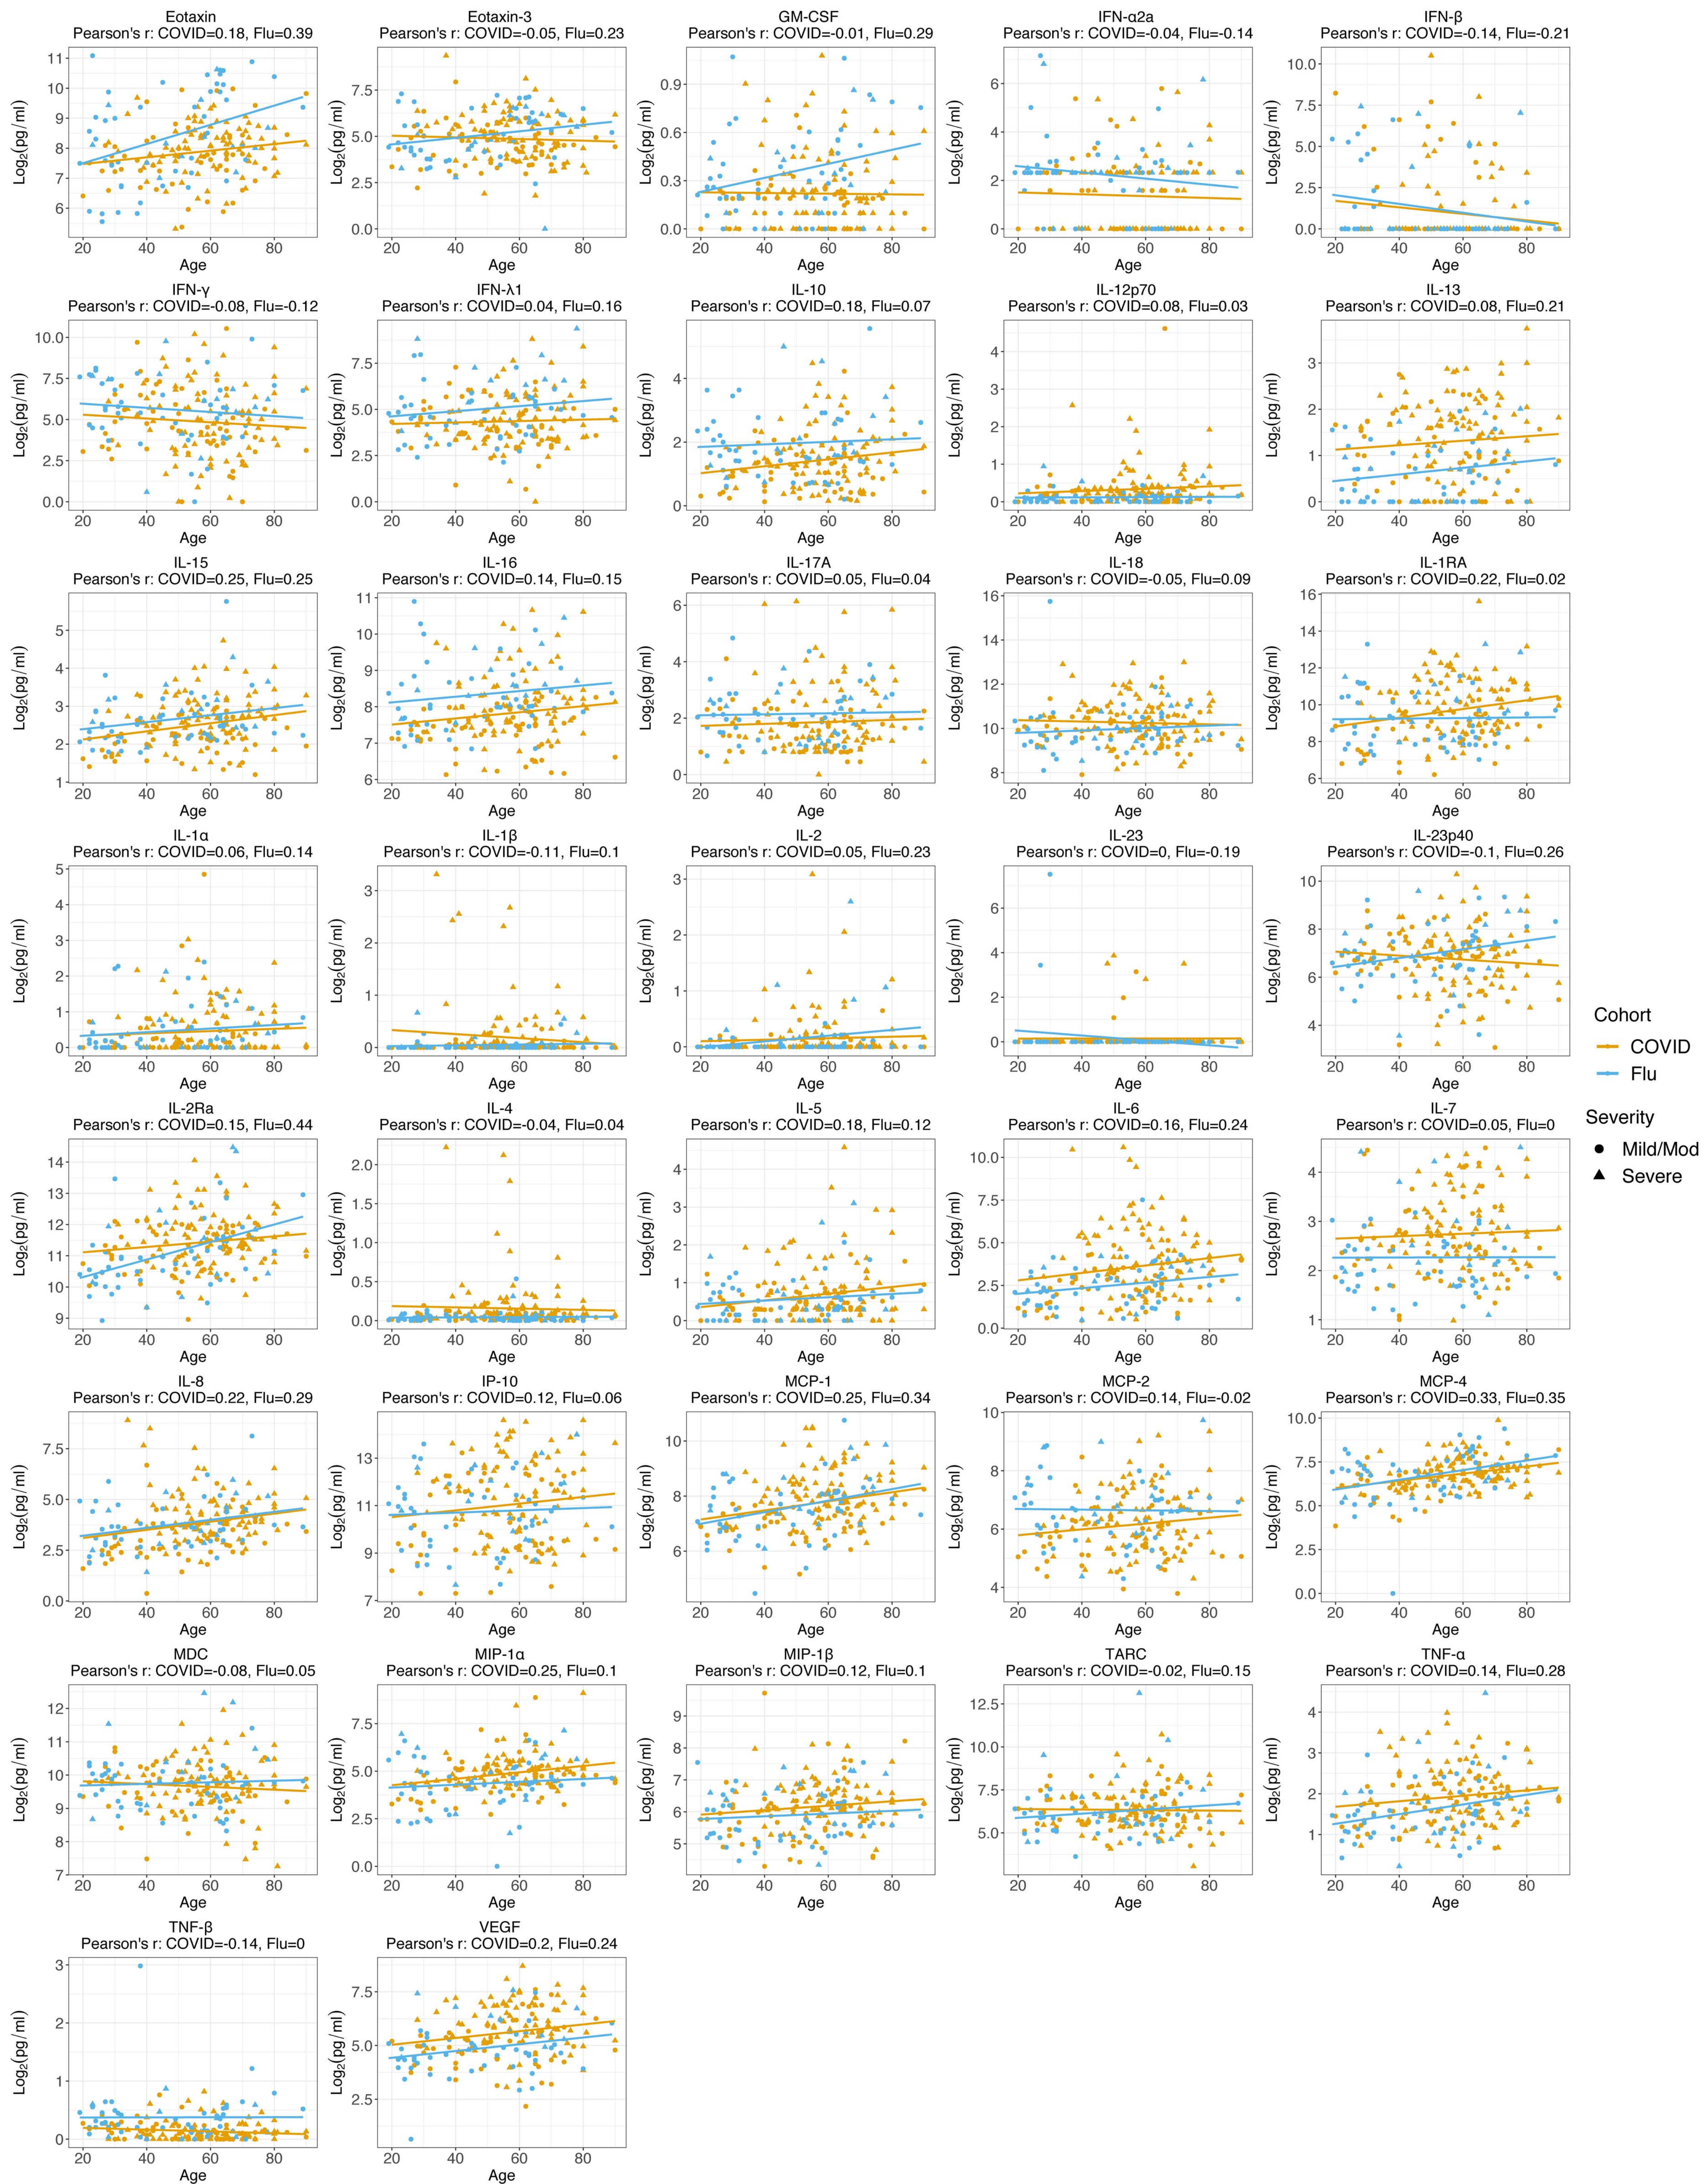

Supplement: ciab376_suppl_supplementary_figure_s6.pdf [file ciab376_suppl_supplementary_figure_s6.pdf]
